# Supplementary material for: Cobalt supported on metal-doped ceria catalysts (M = Zr, Sn and Ti) for NO oxidation
Source: Royal Society of Chemistry journal article supplement (doi:10.1039/c4ra15439h), 2015-01-01
Supplement: c4ra15439h1.pdf [file c4ra15439h1.pdf]

## Supplementary Content

# Cobalt supported on metal-doped ceria catalysts (M = Zr, Sn and Ti) for NO oxidation

Yang Yu<sup>1,2</sup>, Lie Zhong<sup>1,2</sup>, Jie Ding<sup>1,2</sup>, Wei Cai<sup>1,2</sup>, Qin Zhong\*<sup>1,2</sup>

*1 School of Chemical Engineering, Nanjing University of Science and Technology, Nanjing 210094, PR China.*

*2 Nanjing AIREP Environmental Protection Technology Co., Ltd, Nanjing, Jiangsu 210091, PR China.*

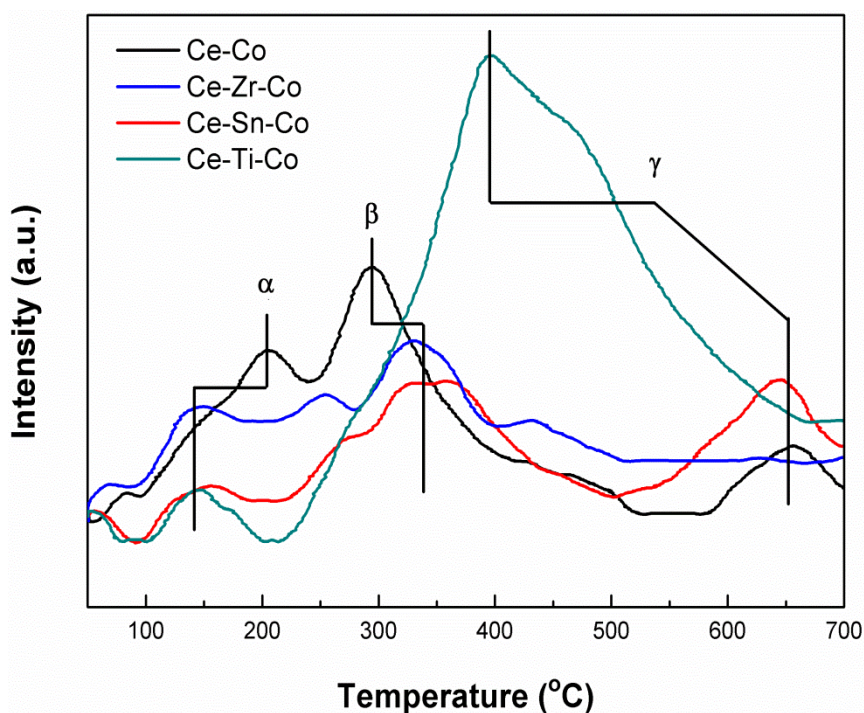

Fig. S1 NO-TPD of these catalysts.

The TPD profiles of NO on these catalysts were shown in Fig. S1. As the temperature was increased from 50 to 700 °C, NO desorption was observed on these

\* Corresponding author. Tel./fax: +86 25 84315517

E-mail: [zq304@mail.njust.edu.cn](mailto:zq304@mail.njust.edu.cn).

samples. All the samples showed three main temperature ranges ( $\alpha$ ,  $\beta$  and  $\gamma$ ), suggesting that NO adsorbed on three different sites [1]. NO desorption was completed over all the samples at below 700 °C. The low temperature peak  $\alpha$  was ascribed to the desorption of NO from weakly bonded sites and the peak  $\beta$  and  $\gamma$  in high temperature range was due to the strongly adsorbed species, i.e., nitrates [2]. The NO desorption amount was consistent with NO capacities of these sorbents. The weakly adsorbed NO (peak  $\alpha$ ) increased with the amount of highly dispersed  $\text{Co}_3\text{O}_4$ . This results indicated the highly dispersed  $\text{Co}_3\text{O}_4$  species were favorable for NO adsorption and desorption, thus improving the catalytic activities. In addition, the adsorbed NO was easy to be desorbed in the temperature range from 50 °C to 250 °C, which indicated that the adsorption NO was weak.

Table S1 The textural properties of  $\text{CeO}_2$ , Ce-Zr, Ce-Sn and Ce-Ti supports.

| Sample              | BET ( $\text{m}^2 \text{g}^{-1}$ ) | $S_{\text{BET}}(500) - S_{\text{BET}}(800)/S_{\text{BET}}(500)$ |
|---------------------|------------------------------------|-----------------------------------------------------------------|
| $\text{CeO}_2$      | 65                                 | /                                                               |
| Ce-Zr               | 91                                 | /                                                               |
| Ce-Sn               | 72                                 | /                                                               |
| Ce-Ti               | 85                                 | /                                                               |
| $\text{CeO}_2$ -800 | 3                                  | 0.9538                                                          |
| Ce-Zr-800           | 46                                 | 0.4945                                                          |
| Ce-Sn-800           | 31                                 | 0.5694                                                          |
| Ce-Ti-800           | 49                                 | 0.4235                                                          |

## References

- [1] J. Xu, Y. J. Wang and Y. F. Zhu, *Langmuir*, 2013, **29**,10566.
- [2] B. Azambre, L. Zenboury, A. Koch and J. V. Weber, *J. Phys. Chem. C*, 2009, **113**,  
13287.
